# Supplementary material for: Inferring direction of associations between histone modifications using a neural processes-based framework
Source: PubMed Central journal article supplement (PMC9813700; doi:10.1016/j.isci.2022.105756), 2022-12-07
Supplement: mmc1.pdf [file mmc1.pdf]

iScience, Volume 26

## **Supplemental information**

### **Inferring direction of associations between histone modifications using a neural processes-based framework**

**Ananthakrishnan Ganesan, Denis Dermadi, Laurynas Kalesinskas, Michele Donato, Rosalie Sowers, Paul J. Utz, and Purvesh Khatri**

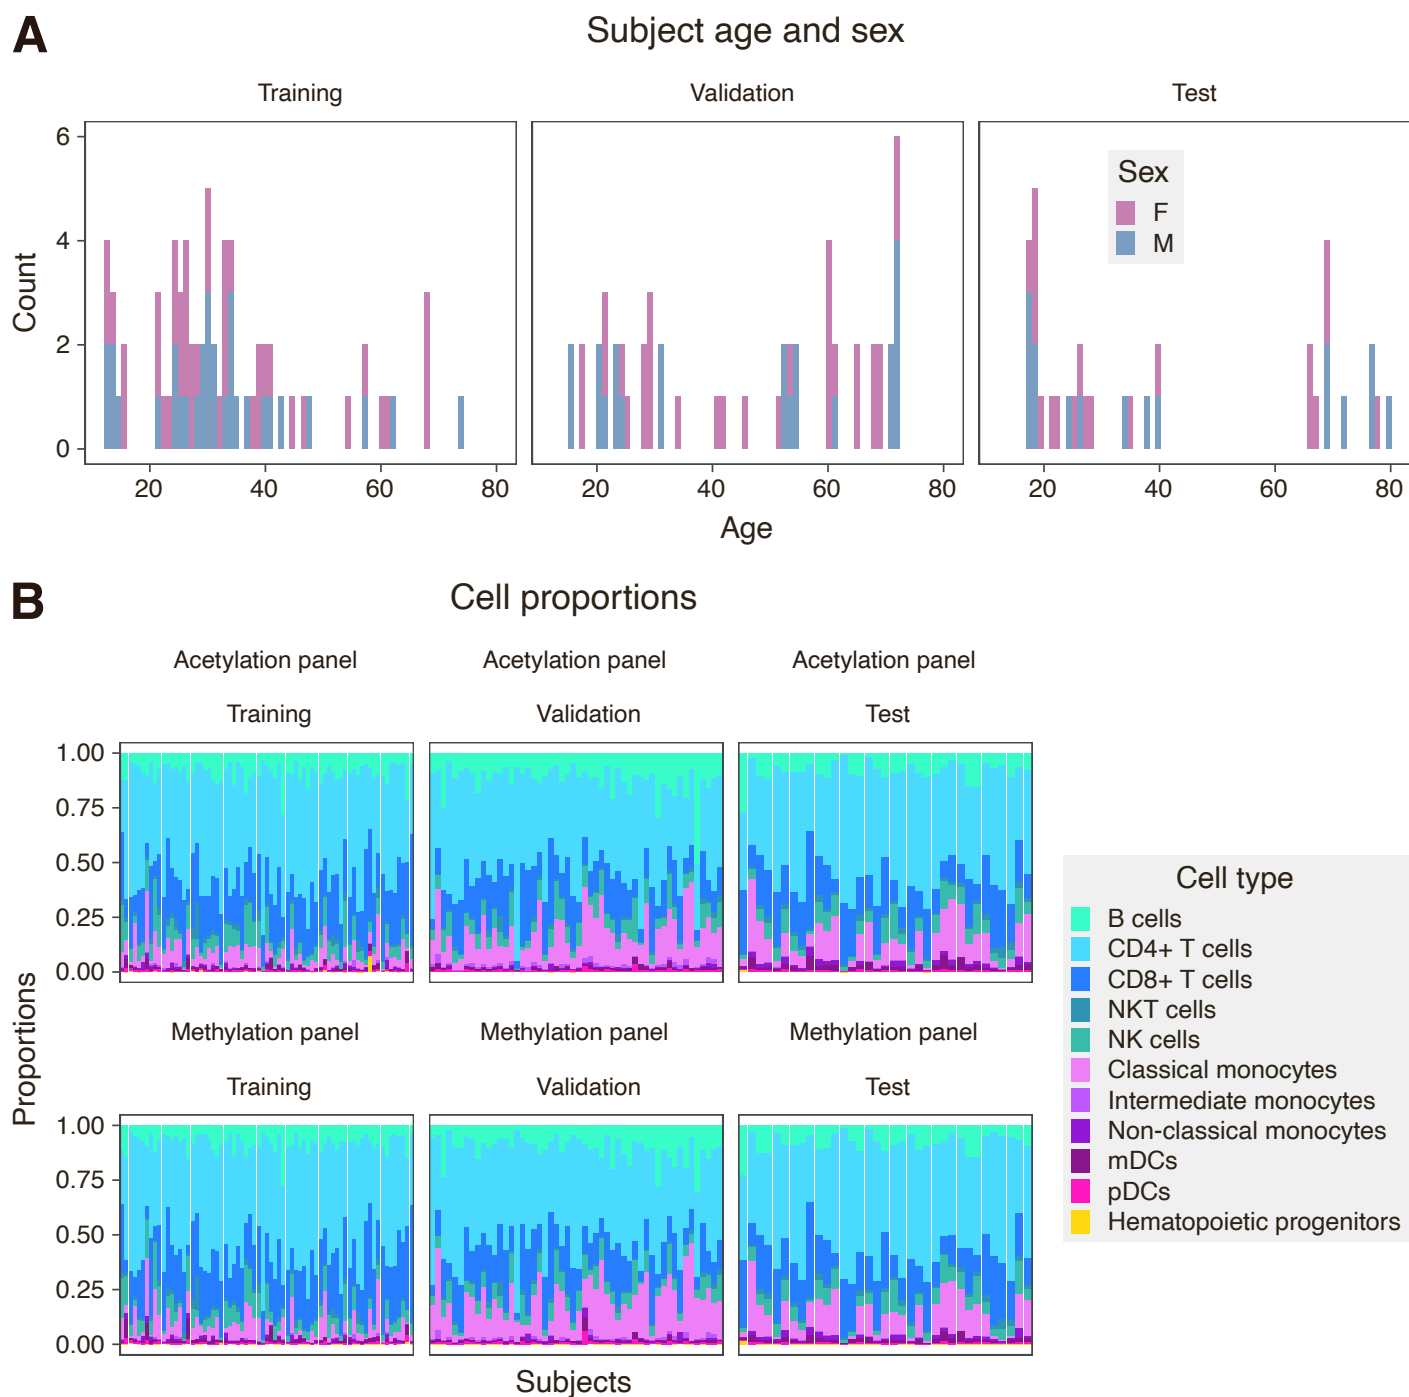

**Figure S1. Summary of EpiTOF data.** A) Distribution of age and sex in training, validation, and test sets. B) Distribution of cell proportions for the 11 immune cell sub-types. Each bar corresponds to a subject. Related to Figure 1.

# Comparison of inputs

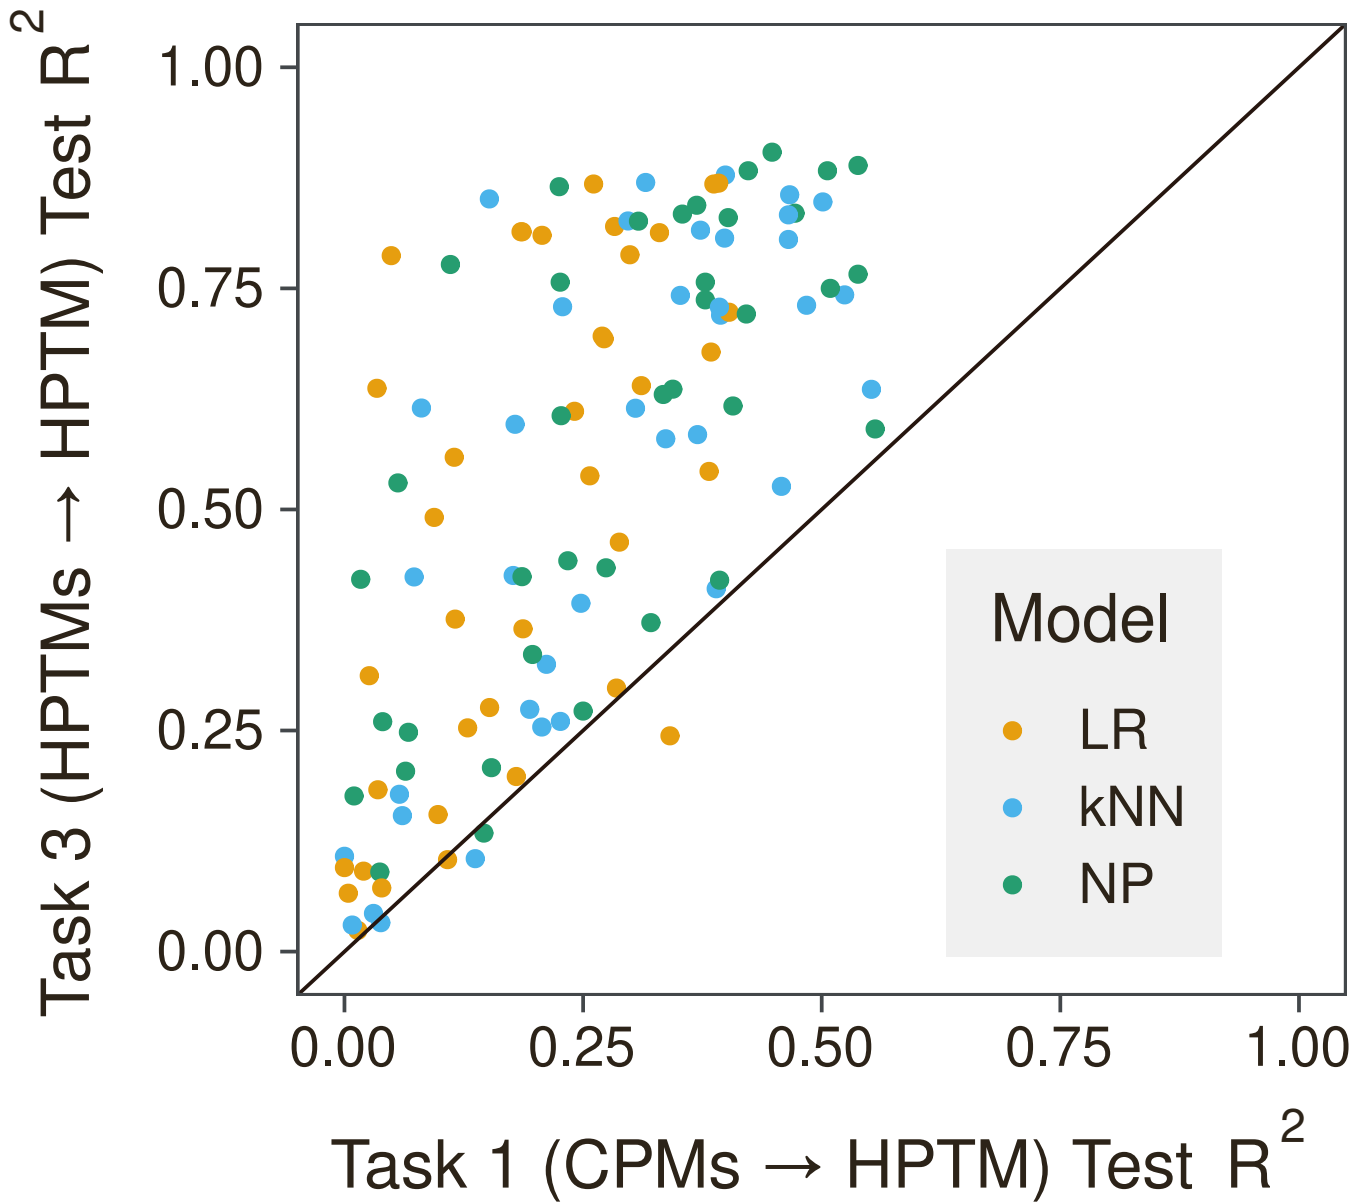

Figure S2. Imputing an HTPM using other HPTMs has higher accuracy than using CPMs. Each dot represents a unique combination of HPTM and algorithm. Related to Figure 1.

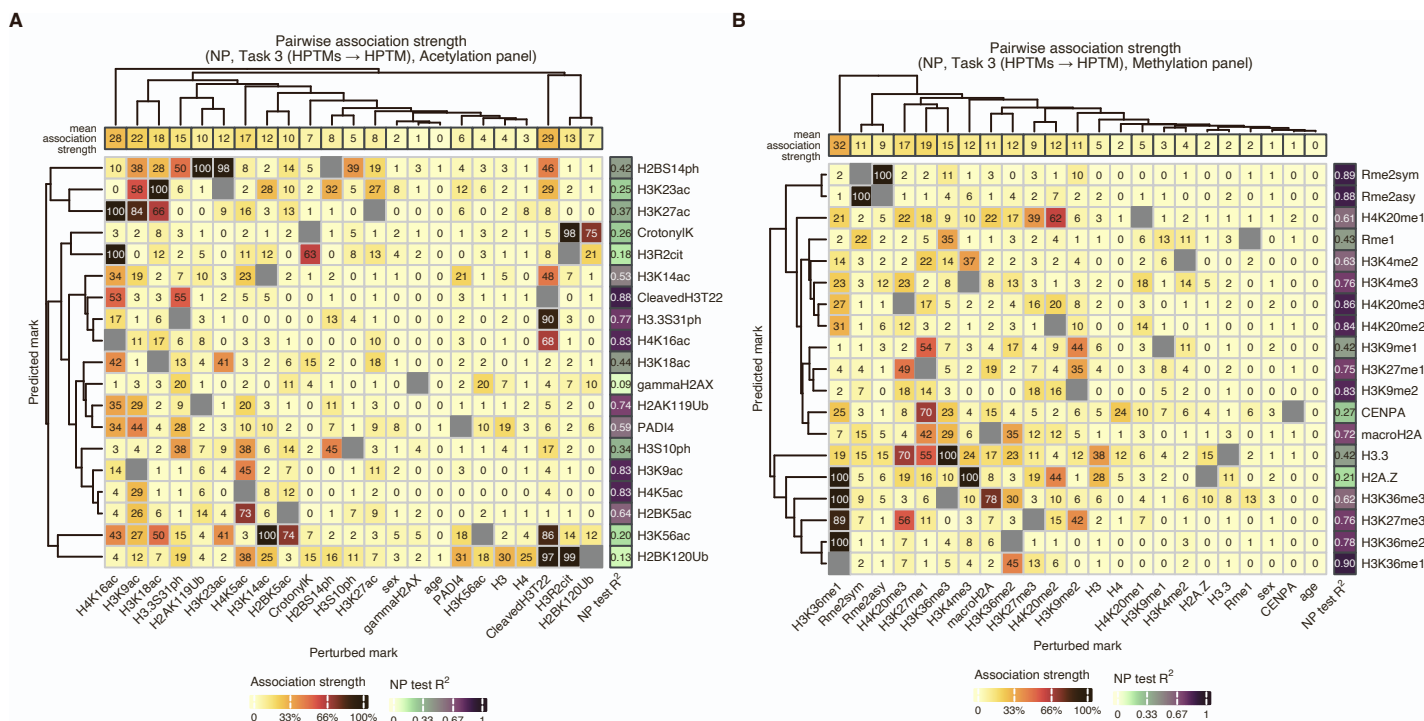

**Figure S3. Inferred strength of associations between each pair of HPTM using NP-based models. NP-inferred association strength in test set for pairs of HPTM in A) acetylation and B) methylation panel. Related to Figure 2.**

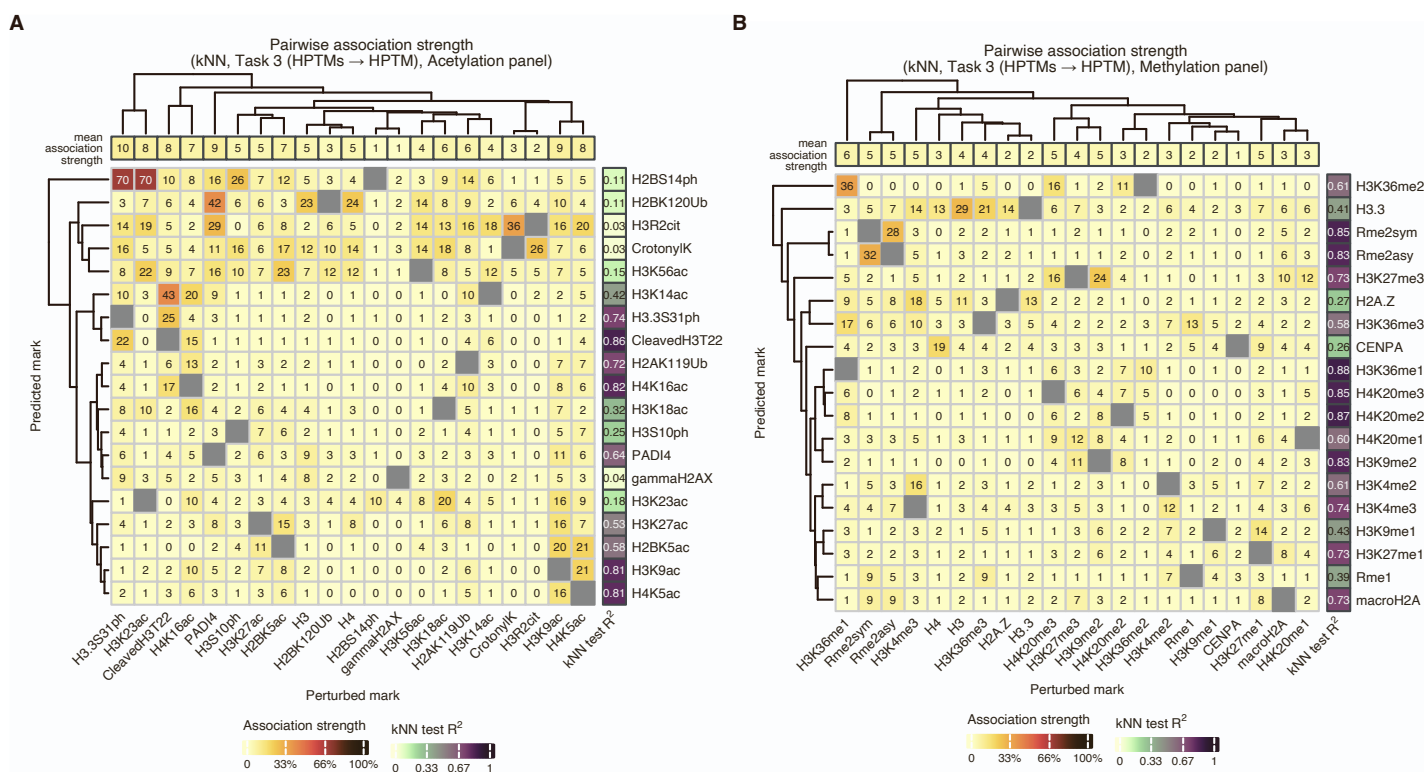

**Figure S4. Inferred strength of associations between each pair of HPTM using kNN-based models. kNN-inferred association strength in test set for pairs of HPTM in A) acetylation and B) methylation panel. Related to Figure 2.**

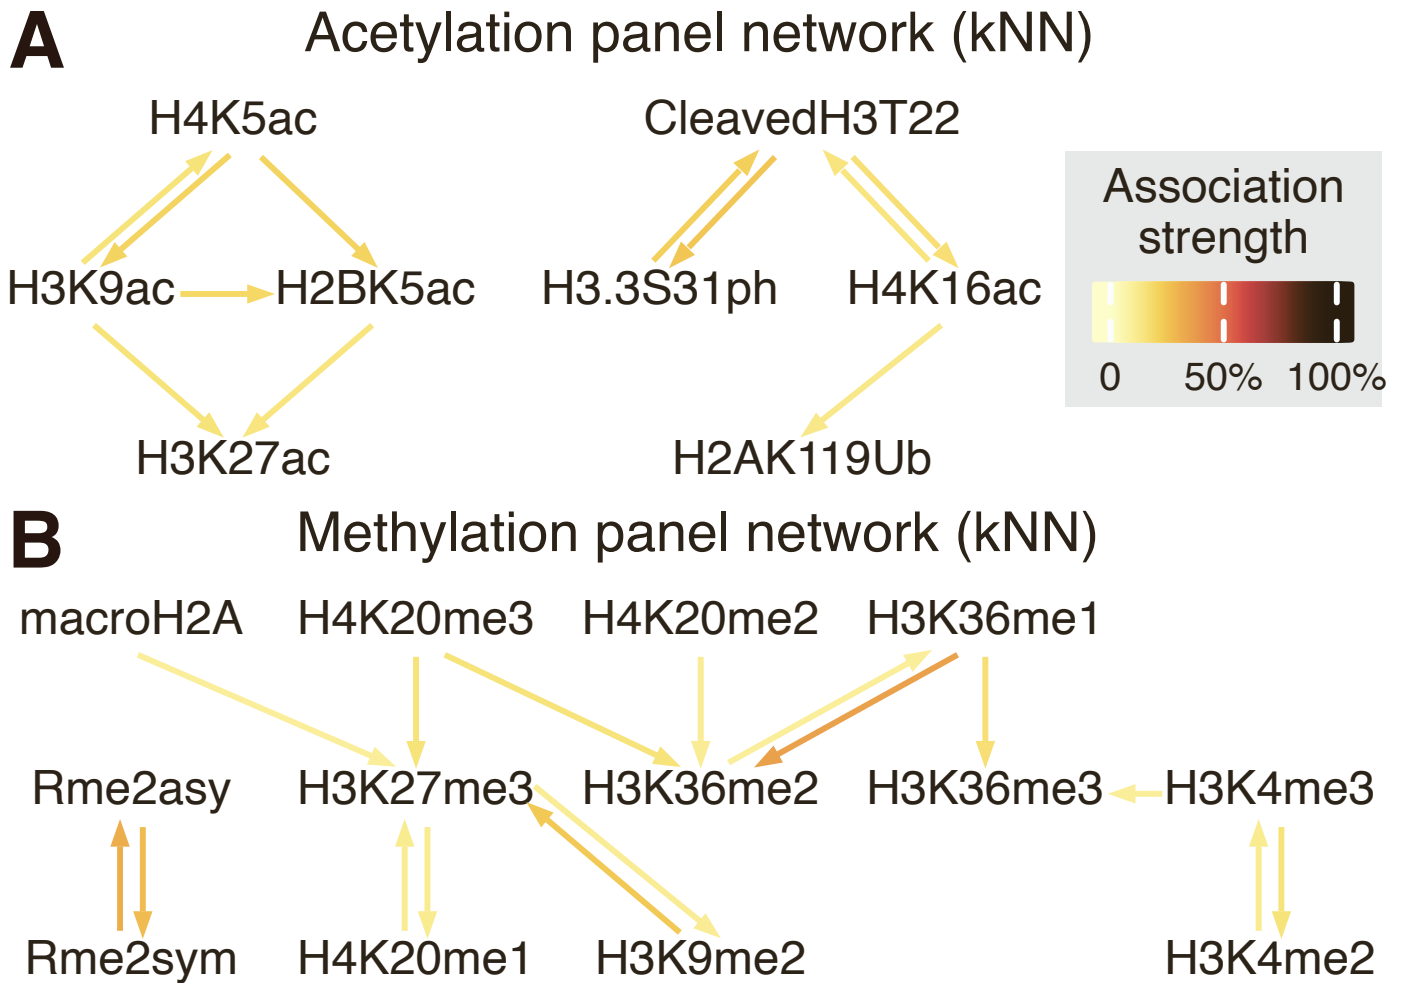

**Figure S5. HPTM association network inferred using *k*NN-based models.** *k*NN-inferred association network in test set for HPTMs in **A**) acetylation and **B**) methylation panel. Related to **Figure 2**.

### Subject-wise variation in associations (Task 3)

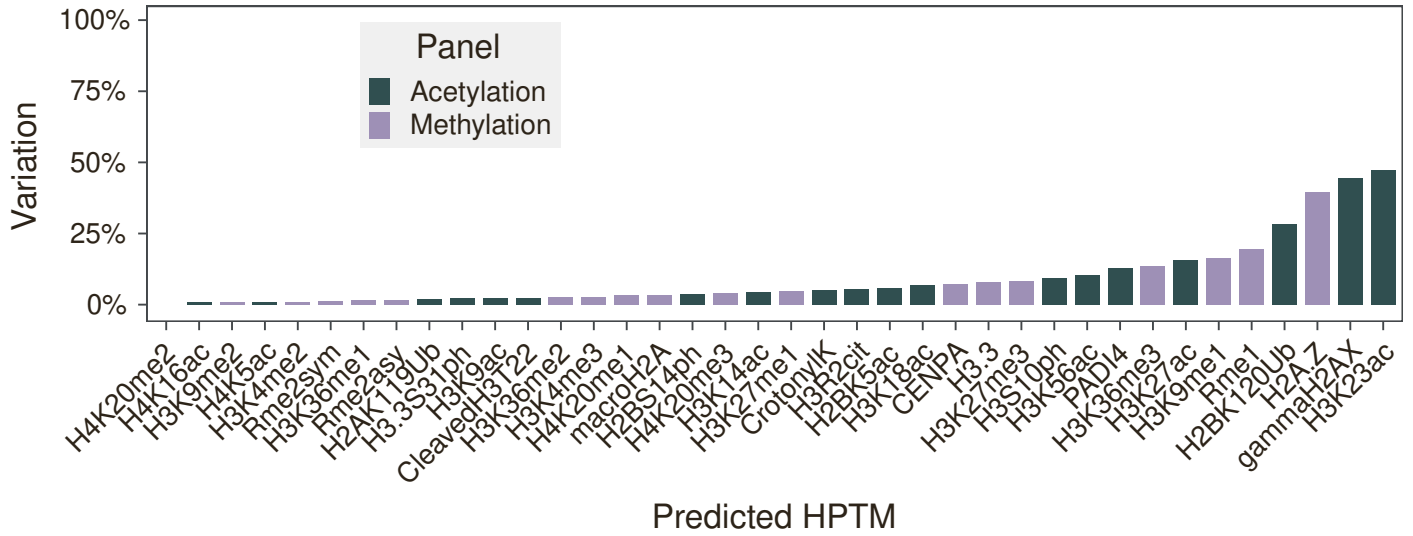

Figure S6. Subject-wise variation in association for each NP-based model when inferring an HPTM using other HPTMs. Related to Figure 2.

### Hybrid models summary

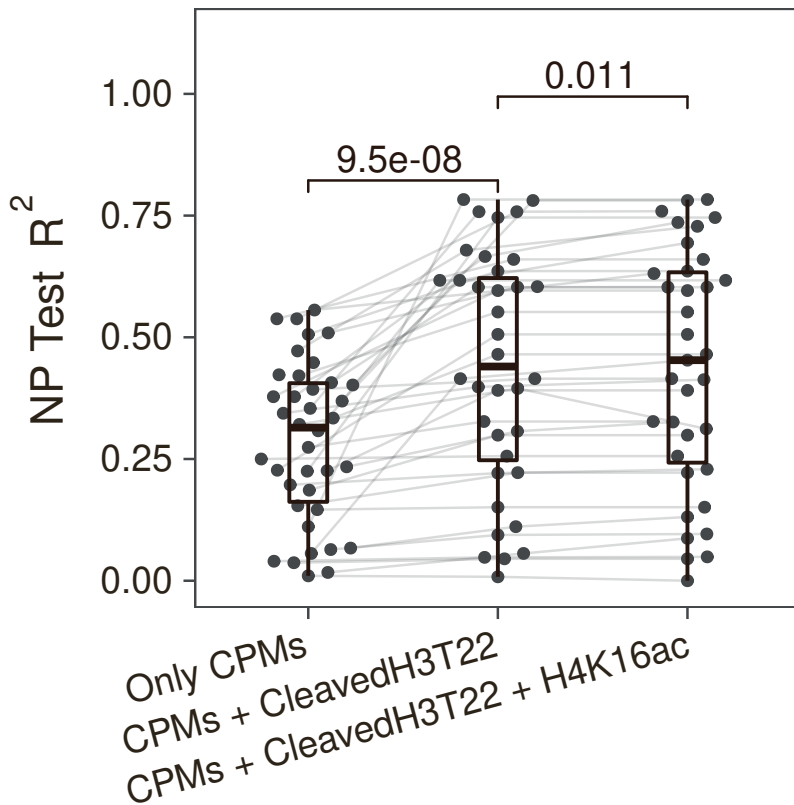

Figure S7. Hybrid NP-based models using CPMs and highly predictive HPTMs (CleavedH3T22, H4K16ac) have significantly higher accuracy than using only CPMs. Each dot corresponds to an HPTM. One-sided, paired Wilcoxon test was used to compute significance of the improvement in  $R^2$  ( $n = 35$  per task). Related to Figure 3.

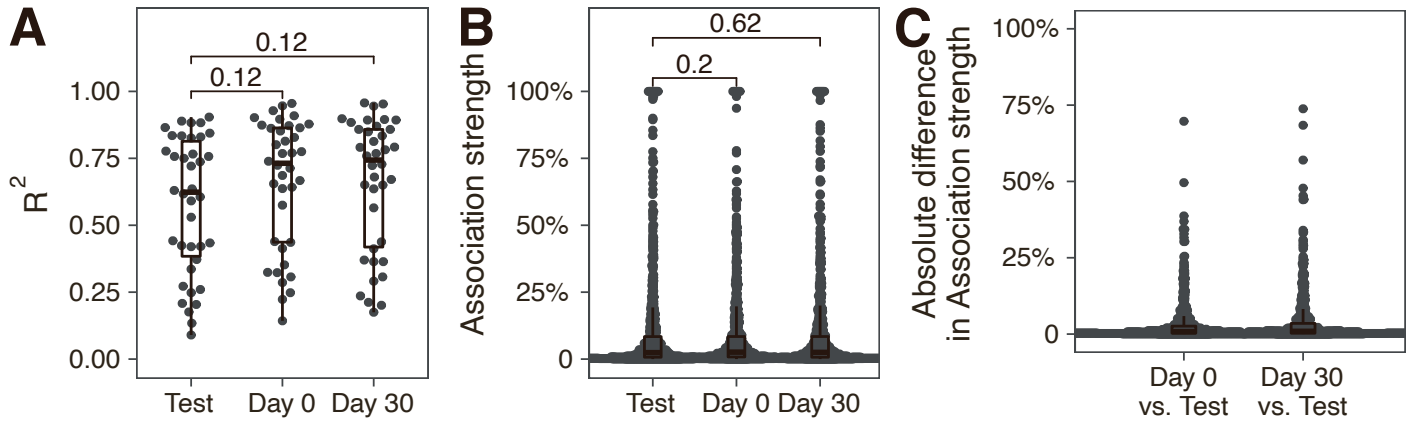

**Figure S8. Summary of NP-based models and inferred associations in Influenza vaccine cohort.** **A)** Comparison of  $R^2$  between test set, *Day 0*, and *Day 30*. Each dot represents an HPTM. FDR-adjusted Wilcoxon test was used to compute significance of differences in proportion means across groups ( $n = 38$  per group). **B)** Comparison of association strength between test set, *Day 0*, and *Day 30*. Each dot represents a unique pair of HPTMs. FDR-adjusted Wilcoxon test was used to compute significance of differences in proportion means across groups ( $n = 684$  per group). **C)** Absolute difference in association strength between test set *vs. Day 0* and *Day 30* time points. Each dot represents a unique pair of HPTMs. Related to **Figure 4**.

**A** Acetylation panel  
All cells combined

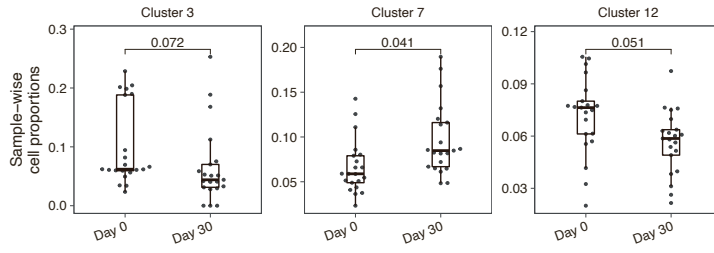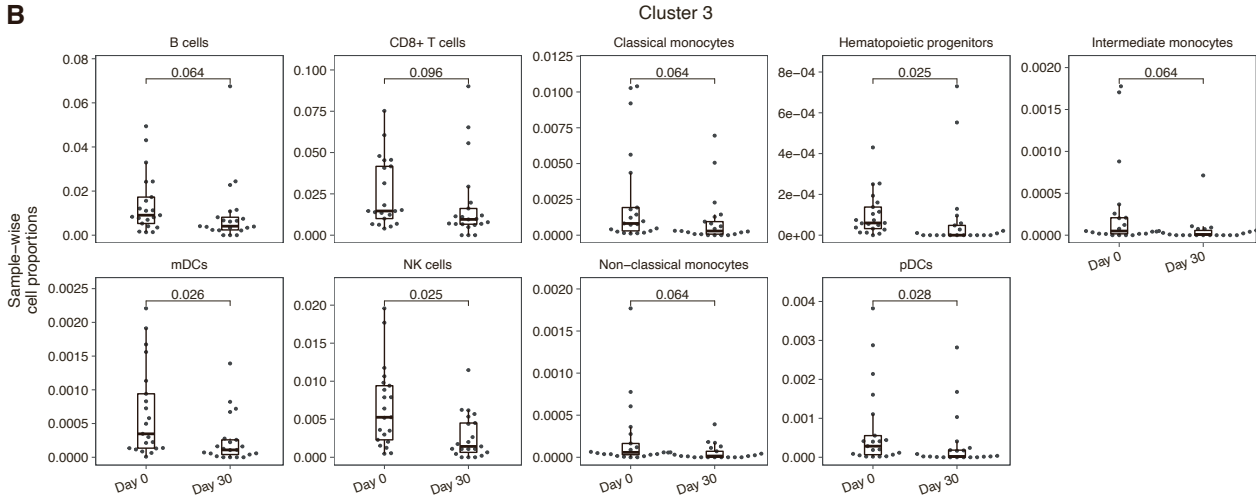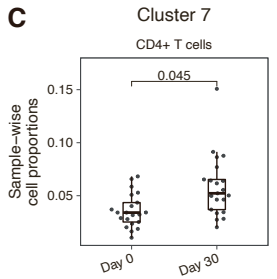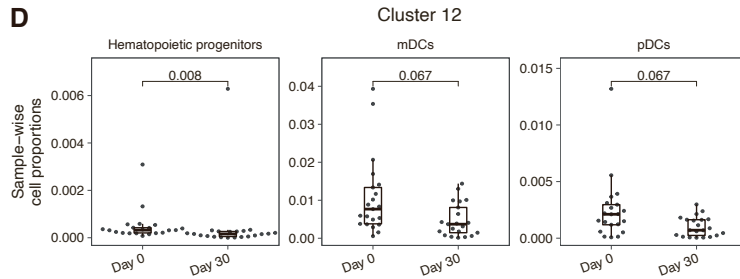

**E** Methylation panel  
All cells combined

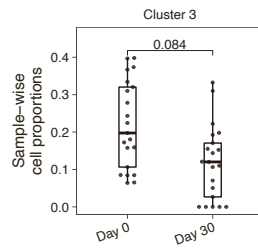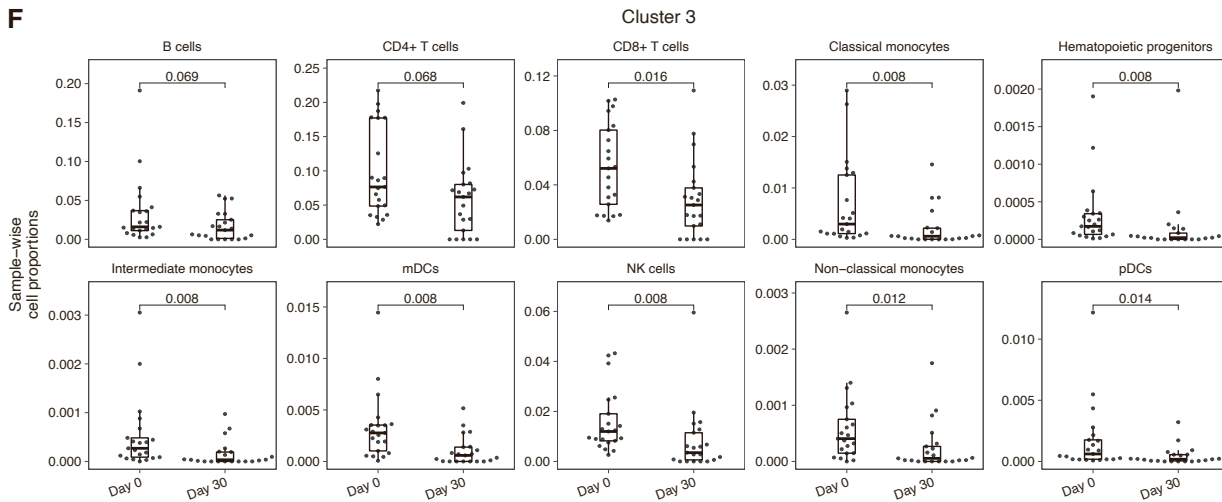



**Figure S9. Differences in cell proportions in HPTM-defined cell clusters 30 days after influenza vaccine.** Sample-wise cell proportions in A) acetylation panel, all cell immune cell sub-types combined, B) acetylation panel, cluster 3, by immune cell sub-type, C) acetylation panel, cluster 7, by immune cell sub-type, D) acetylation panel, cluster 12, by immune cell sub-type, E) methylation panel, all immune cell sub-types combined, and F) methylation panel, cluster 3, by immune cell sub-type. Each dot represents a subject. All cells from all samples were used to calculate the proportions. We used FDR-adjusted Wilcoxon test to compute significance of differences in proportion means across groups (n = 21 per time point). Related to **Figure 4**.

**Table S1: CPMs and HPTMs measured in the EpiTOF data. Related to Figure 1.**

| Shared between both panels | Acetylation Panel | Methylation Panel |
|----------------------------|-------------------|-------------------|
| CD11c                      | CleavedH3T22      | CENPA             |
| CD123                      | CrotonylK         | H2A.Z             |
| CD14                       | gammaH2AX         | H3.3              |
| CD16                       | H2AK119Ub         | H3K27me1          |
| CD19                       | H2BK120Ub         | H3K27me3          |
| CD3                        | H2BK5ac           | H3K36me1          |
| CD4                        | H2BS14ph          | H3K36me2          |
| CD45                       | H3.3S31ph         | H3K36me3          |
| CD56                       | H3K14ac           | H3K4me2           |
| CD8                        | H3K18ac           | H3K4me3           |
| HLADR                      | H3K23ac           | H3K9me1           |
| H3                         | H3K27ac           | H3K9me2           |
| H4                         | H3K56ac           | H4K20me1          |
|                            | H3K9ac            | H4K20me2          |
|                            | H3R2cit           | H4K20me3          |
|                            | H3S10ph           | macroH2A          |
|                            | H4K16ac           | Rme1              |
|                            | H4K5ac            | Rme2asy           |
|                            | PADI4             | Rme2sym           |

**Table S2: Summary of EpiTOF experiments.**

**Related to Figure 1**

| Set                | Experiment          | Num. of Subjects |
|--------------------|---------------------|------------------|
| Train              | Atlanta cohort 1    | 4                |
|                    | Atlanta cohort 2    | 4                |
|                    | Atlanta cohort 3    | 4                |
|                    | Atlanta cohort 4    | 4                |
|                    | Atlanta cohort 5    | 4                |
|                    | Atlanta cohort 6    | 4                |
|                    | Atlanta cohort 7    | 3                |
|                    | Atlanta cohort 8    | 4                |
|                    | Atlanta cohort 9    | 4                |
|                    | Stanford cohort 1   | 6                |
|                    | Stanford cohort 2   | 3                |
|                    | Stanford cohort 3   | 7                |
|                    | South Africa cohort | 10               |
|                    | Oklahoma cohort 1   | 5                |
|                    | Oklahoma cohort 2   | 5                |
| Valid              | Twins cohort 1      | 20               |
|                    | Twins cohort 2      | 20               |
|                    | Atlanta cohort 10   | 4                |
|                    | Oklahoma cohort 3   | 4                |
|                    | Oklahoma cohort 4   | 4                |
| Test               | BR cohort 1         | 12               |
|                    | BR cohort 2         | 12               |
|                    | Atlanta cohort 11   | 4                |
|                    | Atlanta cohort 12   | 3                |
|                    | Atlanta cohort 13   | 4                |
| Flu vaccine cohort | Atlanta cohort 1    | 2                |
|                    | Atlanta cohort 2    | 1                |
|                    | Atlanta cohort 3    | 2                |
|                    | Atlanta cohort 4    | 4                |
|                    | Atlanta cohort 5    | 4                |
|                    | Atlanta cohort 6    | 2                |
|                    | Atlanta cohort 12   | 2                |
|                    | Atlanta cohort 13   | 4                |

Table S3: Neural Processes architecture. Related to Figure 1

| Task                   | Encoder dimensions |          |          |        | Imputer dimensions |          |          |        |
|------------------------|--------------------|----------|----------|--------|--------------------|----------|----------|--------|
|                        | Input              | Hidden 1 | Hidden 2 | Output | Input              | Hidden 1 | Hidden 2 | Output |
| Task 1 (CPMs -> HPTM)  | 16                 | 256      | 256      | 512    | 527                | 256      | 256      | 1      |
| Task 2 (HPTMs -> CPM)  | 24                 | 256      | 256      | 512    | 535                | 256      | 256      | 1      |
| Task 3 (HPTMs -> HPTM) | 23                 | 256      | 256      | 512    | 534                | 256      | 256      | 1      |
| Hybrid models          | 17                 | 256      | 256      | 512    | 528                | 256      | 256      | 1      |
